# Supplementary material for: Assessing the Toxicological Relevance of Nanomaterial Agglomerates and Aggregates Using Realistic Exposure In Vitro
Source: MDPI journal article supplement (doi:10.3390/nano11071793), 2021-07-09
Supplement: s1 [file s1]

*Supplementary file*

## **Assessing the Toxicological Relevance of Nanomaterial Agglomerates and Aggregates Using Realistic Exposure In Vitro**

**Sivakumar Murugadoss <sup>1</sup>, Lode Godderis <sup>2,3</sup>, Manosij Ghosh <sup>1</sup> and Peter H. Hoet <sup>1,\*</sup>**

<sup>1</sup> Laboratory of Toxicology, Unit of Environment and Health, Department of Public Health and Primary Care, KU Leuven, 3000 Leuven, Belgium; sivakumar.murugadoss@kuleuven.be (S.M.); manosij.ghosh@kuleuven.be (M.G.)

<sup>2</sup> Laboratory for Occupational and Environmental Hygiene, Unit of Environment and Health, Department of Public Health and Primary Care, KU Leuven, 3000 Leuven, Belgium; lode.godderis@kuleuven.be

<sup>3</sup> IDEWE, External Service for Prevention and Protection at work, Interleuvenlaan 58, 3001 Heverlee, Belgium

\* Correspondence: peter.hoet@kuleuven.be; Tel.: +32-1633-0197

**Figure S1 and Table S1**—provided in supplementary as they are published elsewhere [1].

**Figure S2 and Table S3**—provided in supplementary as they are published elsewhere [2].

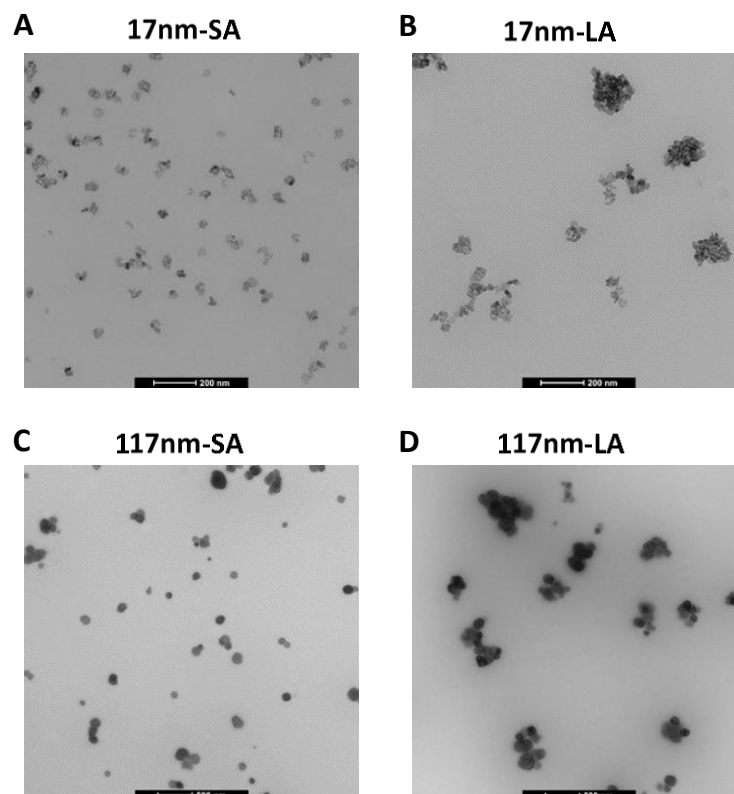

**Figure S1.** Representative TEM micrographs of freshly prepared TiO<sub>2</sub> stock suspensions of small (SA) and large agglomerates (LA). 17nm-SA (A), 17nm-LA (B), 117nm-SA (C) and 117nm-LA (D).

**Table S1.** Characterization of freshly prepared TiO<sub>2</sub> stock suspensions (2.56 mg/mL).

| Stock Suspensions | Description                                            | TEM             |               |                     | PTA                         | DLS            | DLS                 |
|-------------------|--------------------------------------------------------|-----------------|---------------|---------------------|-----------------------------|----------------|---------------------|
|                   |                                                        | Median ECD (nm) | Mean ECD (nm) | Mean Feret min (nm) | Mean Hydrodynamic size (nm) | Z-average (nm) | Zeta potential (mV) |
| 17nm-SA           | Small agglomerates of 17 nm sized TiO <sub>2</sub> NP  | 18              | 100           | 33                  | 134                         | 600            | 33                  |
| 17nm-LA           | Large agglomerates of 17 nm sized TiO <sub>2</sub> NP  | 127             | 200           | 120                 | 207                         | 900            | -37                 |
| 117nm-SA          | Large agglomerates of 117 nm sized TiO <sub>2</sub> NP | 122             | 250           | 148                 | 259                         | 280            | -46                 |
| 117nm-LA          | Large agglomerates of 117 nm sized TiO <sub>2</sub> NP | 352             | 500           | 309                 | 221                         | 580            | 15                  |

Median and mean equivalent circle diameter (ECD) and mean feret minimum (feret min) measured by transmission electron microscopy (TEM), Z-average (mean hydrodynamic size) by dynamic light scattering (DLS) and mean hydrodynamic size by particle tracking analysis (PTA).

**Table S2.** Z-average sizes (measured by DLS) of TiO<sub>2</sub> suspensions in different cell culture medium (100 µg/mL) at different time points.

| CCM   | 17nm-SA |       | 17nm-LA |       | 117nm-SA |       | 117nm-LA |       |
|-------|---------|-------|---------|-------|----------|-------|----------|-------|
|       | 0h      | 24h   | 0h      | 24h   | 0h       | 24h   | 0h       | 24h   |
| HBE   | 685.2   | 575.3 | 784     | 779.8 | 338.9    | 305.6 | 574.5    | 788   |
| Caco2 | 583.8   | 463.8 | 753.9   | 705.6 | 349.5    | 353.5 | 615.7    | 706.2 |
| THP-1 | 575.9   | 594.8 | 886     | 907   | 348.8    | 343.8 | 569      | 635.1 |

CCM—complete culture medium.

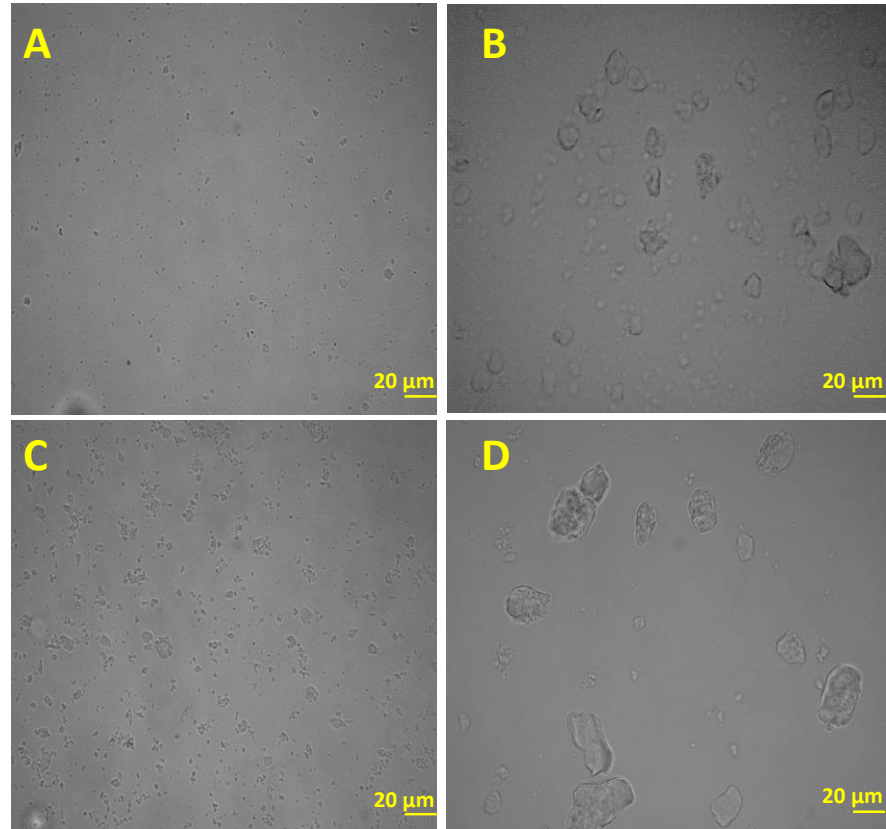

**Figure S2.** Representative bright field microscopic images of freshly prepared SAS stock suspensions. DE-AGGR (A), AGGR (B), SuperN (C) and PREC (D). Scale bar -20μm.

**Table S3.** Characterization of freshly prepared SAS stock suspensions.

| Stock Suspensions | Description                        | Stock Concentration (mg/mL) | TEM              |                     | DLS            | BF                            | DLS                 |
|-------------------|------------------------------------|-----------------------------|------------------|---------------------|----------------|-------------------------------|---------------------|
|                   |                                    |                             | Mean ECD (nm)    | Mean Feret min (nm) | Z-average (nm) | Approx. average diameter (μm) | Zeta potential (mV) |
| DE-AGGR           | De-aggregated suspension           | 2.56                        | 100              | 28                  | 264            | n/a                           | -33                 |
| AGGR              | Aggregated suspension              | 2.56                        | 2000             | 600                 | 1,2530         | n/a                           | n/a                 |
| SuperN            | Non-precipitating fraction of AGGR | 0.64                        | 600 <sup>a</sup> | n/a                 | 3953           | 2.5                           | n/a                 |
| PREC              | Precipitating fraction of AGGR     | 1.92                        | 750 <sup>a</sup> | n/a                 | 3332           | 25                            | n/a                 |

Median and mean equivalent circle diameter (ECD) and mean feret minimum (feret min) measured by transmission electron microscopy (TEM), Z-average (mean hydrodynamic size) by dynamic light scattering (DLS) and average diameter by bright field microscopy (BF). n/a - not available due to their quick sedimentation while performing zeta potential measurements.

**Table S4.** Z-average sizes (measured by DLS) of SAS suspensions in different cell culture medium (100 µg/mL).

| CCM   | DE-AGGR |       | AGGR |       | SuperN |      | PREC |      |
|-------|---------|-------|------|-------|--------|------|------|------|
|       | 0h      | 24h   | 0h   | 24h   | 0h     | 24h  | 0h   | 24h  |
| HBE   | 220.4   | 207.7 | 2087 | 2353  | 4507   | 3851 | 1101 | 957  |
| Caco2 | 155.2   | 178.9 | 1049 | 151.7 | 4500   | 2233 | 1370 | 1376 |
| THP-1 | 162.2   | 166.4 | 3359 | 3057  | 5507   | 3166 | 1571 | 955  |

CCM—complete culture medium.

(a)

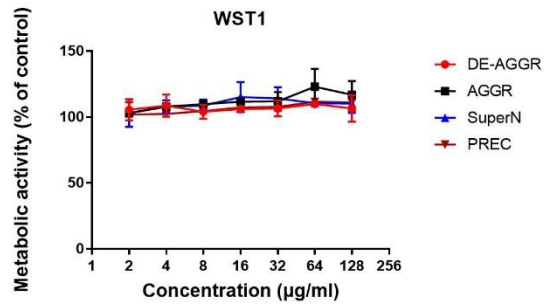

(b)

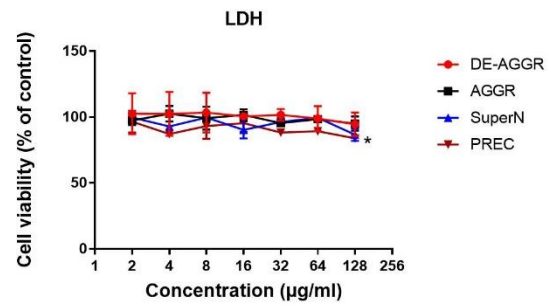

(c)

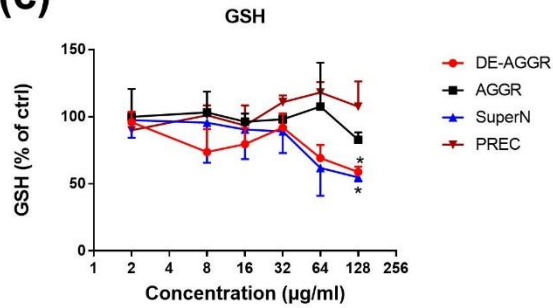

(d)

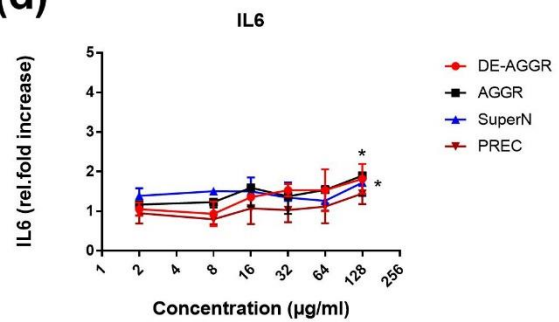

(e)

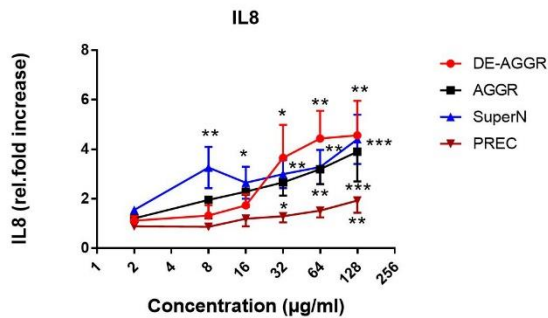

---

**Figure S3.** Influence of SAS aggregation on cytotoxicity and biological responses. Effect on cell metabolic activity (a), cell viability (b), total glutathione (c), IL-6 (d) and IL-8 secretion (e) measured in HBE after 24h exposure to different SAS suspensions. The exposures were performed in the presence of serum. Methods to measure different endpoints were provided in detail in [2]. Data are expressed as means  $\pm$  SD from three independent experiments performed in triplicates or duplicates.  $p < 0.05$  (\*),  $p < 0.01$  (\*\*) and  $p < 0.001$  (\*\*\*) represent significant differences compared to control (One-way ANOVA followed by Dunnett's multiple comparison test).

## References

1. Murugadoss, S.; Brassinne, F.; Sebaihi, N.; Petry, J.; Cokic, S.M.; Van Landuyt, K.L.; Godderis, L.; Mast, J.; Lison, D.; Hoet, P.H.; et al. Agglomeration of titanium dioxide nanoparticles increases toxicological responses in vitro and in vivo. *Part. Fibre Toxicol.* **2020**, *17*, 1–14.
2. Murugadoss, S.; Brule, S.V.D.; Brassinne, F.; Sebaihi, N.; Mejia, J.; Lucas, S.; Petry, J.; Godderis, L.; Mast, J.; Lison, D.; et al. Is aggregated synthetic amorphous silica toxicologically relevant? *Part. Fibre Toxicol.* **2020**, *17*, 1–12.
